# Supplementary material for: Genetic Relationship between Schizophrenia and Nicotine Dependence
Source: PubMed Central journal article supplement (PMC4862382; doi:10.1038/srep25671), 2016-05-10
Supplement: srep25671-s1.pdf [file srep25671-s1.pdf]

# Genetic Relationship between Schizophrenia and Nicotine Dependence

*Jingchun Chen<sup>1,\*</sup>, Silviu-Alin Bacanu<sup>2,\*</sup>, Hui Yu<sup>3</sup>, Zhongming Zhao<sup>3</sup>, Peilin Jia<sup>3</sup>, Kenneth S Kendler<sup>2</sup>, Henry R. Kranzler<sup>4</sup>, Joel Gelernter<sup>5</sup>, Lindsay Farrer<sup>6</sup>, Camelia Minica<sup>7</sup>, Rene Pool<sup>7</sup>, Yuri Milaneschi<sup>8</sup>, Dorret I Boomsma<sup>7</sup>, Brenda W. J. H. Penninx<sup>7</sup>, Rachel F. Tyndale<sup>9</sup>, Jennifer J. Ware<sup>10</sup>, Cotinine meta-analysis group, FTND meta-analysis group, Jacqueline Vink<sup>7</sup>, Jaakko Kaprio<sup>11,12,13</sup>, Marcus Munafò<sup>10,14</sup>, Xiangning Chen<sup>1, #</sup>*

Supplementary Table S1. Data sets used in FTND and cotinine genome-wide meta-analyses

| Samples    |               |                   | SCZ risk | Reference |
|------------|---------------|-------------------|----------|-----------|
|            | N (phenotype) | Phenotype         | score    |           |
| ALSPAC     | 258/161/193   | COTININE/FTND/TFC | No       | [1]       |
| CARDIA     | 387           | COTININE          | No       | [2]       |
| FinnTwin   | 145           | COTININE          | No       | [3-5]     |
| FINRISK    | 218           | COTININE          | No       | [6, 32]   |
| Framingham | 93            | COTININE          | No       | [7]       |
| GenMets    | 485           | COTININE          | No       | [8]       |
| MESA       | 189           | COTININE          | No       | [9]       |
| NESDA      | 808           | COTININE          | No       | [10]      |
| NTR        | 897/2436/2484 | COTININE/FTND/TFC | No       | [11-16]   |
| TwinsUK    | 676           | COTININE          | No       | [17]      |
| YFS        | 392           | COTININE          | No       | [18]      |
| SAGE       | 2042/2042     | FTND/TFC          | Yes      | [19-21]   |
| SC         | 2479/2479     | FTND/TFC          | Yes      | [22,23]   |
| MGS        | 2496/2496     | FTND/TFC          | No       | [24]      |
| COPD       | 320/320       | FTND/TFC          | Yes      | [25]      |
| ISIB       | 299/265       | FTND/TFC          | Yes      | [26]      |
| CIDR370v1  | 166/574       | FTND/TFC          | Yes      | [27]      |
| CIDR370v3  | 251/598       | FTND/TFC          | Yes      | [27]      |
| CIDRc3     | 1710          | TFC               | Yes      | [28]      |
| CIDRc4     | 477           | TFC               | Yes      | [29]      |
| EAGLE      | 3051          | FTND              | Yes      | [30]      |
| AUTW       | 190/190       | FTND/TFC          | No       | -         |
| CEDAR      | 294/294       | FTND/TFC          | No       | -         |
| FIN1       | 1563/1573     | FTND/TFC          | No       | [3-5]     |
| FIN2       | 811/811       | FTND/TFC          | No       | [3-5]     |
| Yale_Penn  | 2114/2117     | FTND/TFC          | No       | [31]      |

## References

- [1] Boyd A, Golding J, Macleod J, Lawlor DA, Fraser A, Henderson J et al. Cohort Profile: the 'children of the 90s'--the index offspring of the Avon Longitudinal Study of Parents and Children. *Int J Epidemiol* 2013, 42: 111-127.
- [2] Hughes GH, Cutter G, Donahue R, Friedman GD, Hulley S, Hunkeler E et al. Recruitment in the Coronary Artery Disease Risk Development in Young Adults (Cardia) Study. *Control Clin Trials* 1987, 8: 68S-73S.
- [3] Kaprio J. Twin studies in Finland 2006. *Twin Res Hum Genet* 2006, 9: 772-777.
- [4] Kaprio J. The Finnish Twin Cohort Study: an update. *Twin Res Hum Genet* 2013, 16: 157-162.
- [5] Loukola A, Wedenoja J, Keskitalo-Vuokko K, Broms U, Korhonen T, Ripatti S et al. Genome-wide association study on detailed profiles of smoking behavior and nicotine dependence in a twin sample. *Mol Psychiatry* 2014, 19: 615-624.
- [6] Vartiainen E, Seppala T, Lillsunde P, Puska P. Validation of self reported smoking by serum cotinine measurement in a community-based study. *J Epidemiol Community Health* 2002, 56: 167-170.
- [7] Wang TJ, Larson MG, Vasan RS, Cheng S, Rhee EP, McCabe E et al. Metabolite profiles and the risk of developing diabetes. *Nat Med* 2011, 17: 448-453.

- [8] Keskitalo K, Broms U, Heliovaara M, Ripatti S, Surakka I, Perola M et al. Association of serum cotinine level with a cluster of three nicotinic acetylcholine receptor genes (CHRNA3/CHRNA5/CHRNA4) on chromosome 15. *Hum Mol Genet* 2009, 18: 4007-4012.
- [9] Bild DE, Bluemke DA, Burke GL, Detrano R, Diez Roux AV, Folsom AR et al. Multi-ethnic study of atherosclerosis: objectives and design. *Am J Epidemiol* 2002, 156: 871-881.
- [10] Penninx BW, Beekman AT, Smit JH, Zitman FG, Nolen WA, Spinhoven P et al. The Netherlands Study of Depression and Anxiety (NESDA): rationale, objectives and methods. *Int J Methods Psychiatr Res* 2008, 17: 121-140.
- [11] Boomsma DI, Vink JM, van Beijsterveldt TC, de Geus EJ, Beem AL, Mulder EJ et al. Netherlands Twin Register: a focus on longitudinal research. *Twin Res* 2002, 5: 401-406.
- [12] Boomsma DI, de Geus EJ, Vink JM, Stubbe JH, Distel MA, Hottenga JJ et al. Netherlands Twin Register: from twins to twin families. *Twin Res Hum Genet* 2006, 9: 849-857.
- [13] Willemsen G, de Geus EJ, Bartels M, van Beijsterveldt CE, Brooks AI, Estourgie-van Burk GF et al. The Netherlands Twin Register biobank: a resource for genetic epidemiological studies. *Twin Res Hum Genet* 2010, 13: 231-245.
- [14] Willemsen G, Vink JM, Abdellaoui A, den BA, van Beek JH, Draisma HH et al. The Adult Netherlands Twin Register: twenty-five years of survey and biological data collection. *Twin Res Hum Genet* 2013, 16: 271-281.
- [15] Scheet P, Ehli EA, Xiao X, van Beijsterveldt CE, Abdellaoui A, Althoff RR et al. Twins, tissue, and time: an assessment of SNPs and CNVs. *Twin Res Hum Genet* 2012, 15: 737-745.
- [16] Vink JM, Willemsen G, Beem AL, Boomsma DI. The Fagerstrom Test for Nicotine Dependence in a Dutch sample of daily smokers and ex-smokers. *Addict Behav* 2005, 30: 575-579.
- [17] Moayyeri A, Hammond CJ, Valdes AM, Spector TD. Cohort Profile: TwinsUK and healthy ageing twin study. *Int J Epidemiol* 2013, 42: 76-85.
- [18] Raitakari OT, Juonala M, Ronnema T, Keltikangas-Jarvinen L, Rasanen L, Pietikainen M et al. Cohort profile: the cardiovascular risk in Young Finns Study. *Int J Epidemiol* 2008, 37: 1220-1226.
- [19] Saccone SF, Hinrichs AL, Saccone NL, Chase GA, Konvicka K, Madden PA et al. Cholinergic nicotinic receptor genes implicated in a nicotine dependence association study targeting 348 candidate genes with 3713 SNPs. *Hum Mol Genet* 2007, 16: 36-49.
- [20] Bierut LJ, Saccone NL, Rice JP, Goate A, Foroud T, Edenberg H et al. Defining alcohol-related phenotypes in humans. The Collaborative Study on the Genetics of Alcoholism. *Alcohol Res Health* 2002, 26: 208-213.
- [21] Bierut LJ, Strickland JR, Thompson JR, Afful SE, Cottler LB, Shi J et al. Drug use and dependence in cocaine dependent subjects, community-based individuals, and their siblings. *Drug Alcohol Depend* 2008, 95: 14-22.
- [22] Piper ME, Smith SS, Schlam TR, Fiore MC, Jorenby DE, Fraser D et al. A randomized placebo-controlled clinical trial of 5 smoking cessation pharmacotherapies. *Arch Gen Psychiatry* 2009, 66: 1253-1262.
- [23] Japuntich SJ, Leventhal AM, Piper ME, Bolt DM, Roberts LJ, Fiore MC et al. Smoker characteristics and smoking-cessation milestones. *Am J Prev Med* 2011, 40: 286-294.
- [24] Shi J, Levinson DF, Duan J, Sanders AR, Zheng Y, Pe'er I et al. Common variants on chromosome 6p22.1 are associated with schizophrenia. *Nature* 2009, 460: 753-757.
- [25] Regan EA, Hokanson JE, Murphy JR, Make B, Lynch DA, Beaty TH et al. Genetic epidemiology of COPD (COPDGene) study design. *COPD* 2010, 7: 32-43.
- [26] Prescott CA, Sullivan PF, Kuo PH, Webb BT, Vittum J, Patterson DG et al. Genomewide linkage study in the Irish affected sib pair study of alcohol dependence: evidence for a susceptibility region for symptoms of alcohol dependence on chromosome 4. *Mol Psychiatry* 2006, 11: 603-611.
- [27] Whitfield JB, Zhu G, Madden PA, Neale MC, Heath AC, Martin NG. The genetics of alcohol intake and of alcohol dependence. *Alcohol Clin Exp Res* 2004, 28: 1153-1160.

- [28] Shand FL, Degenhardt L, Nelson EC, Mattick RP, Malison RT, Kalayasiri R et al. Predictors of social anxiety in an opioid dependent sample and a control sample Inter-rater reliability and concurrent validity of DSM-IV opioid dependence in a Hmong isolate using the Thai version of the Semi-Structured Assessment for Drug Dependence and Alcoholism (SSADDA). *J Anxiety Disord* 2010, 24: 49-54.
- [29] Sherva R, Kranzler HR, Yu Y, Logue MW, Poling J, Arias AJ et al. Variation in nicotinic acetylcholine receptor genes is associated with multiple substance dependence phenotypes. *Neuropsychopharmacology* 2010, 35: 1921-1931.
- [30] Landi MT, Consonni D, Rotunno M, Bergen AW, Goldstein AM, Lubin JH et al. Environment And Genetics in Lung cancer Etiology (EAGLE) study: an integrative population-based case-control study of lung cancer. *BMC Public Health* 2008, 8: 203-
- [31] Han S, Yang BZ, Kranzler HR, Oslin D, Anton R, Gelernter J. Association of CHRNA4 polymorphisms with smoking behavior in two populations. *Am J Med Genet B Neuropsychiatr Genet* 2011, 156B: 421-429.
- [32] Broms U, Pennanen M, Patja K, Ollila H, Korhonen T, Kankaanpää A, Haukkala A, Tuulio-Henriksson A, Koskenvuo M, Kronholm E, Laatikainen T, Peltonen M, Partonen, T, Kaprio J. Diurnal Evening Type is Associated with Current Smoking, Nicotine Dependence and Nicotine Intake in the Population Based National FINRISK 2007 Study. *J Addict Res Ther.* 2012 Jan 25;S2. pii: 002. PubMed PMID: 22905332; PubMed Central PMCID: PMC3422076.

## Distribution of Risk Scores

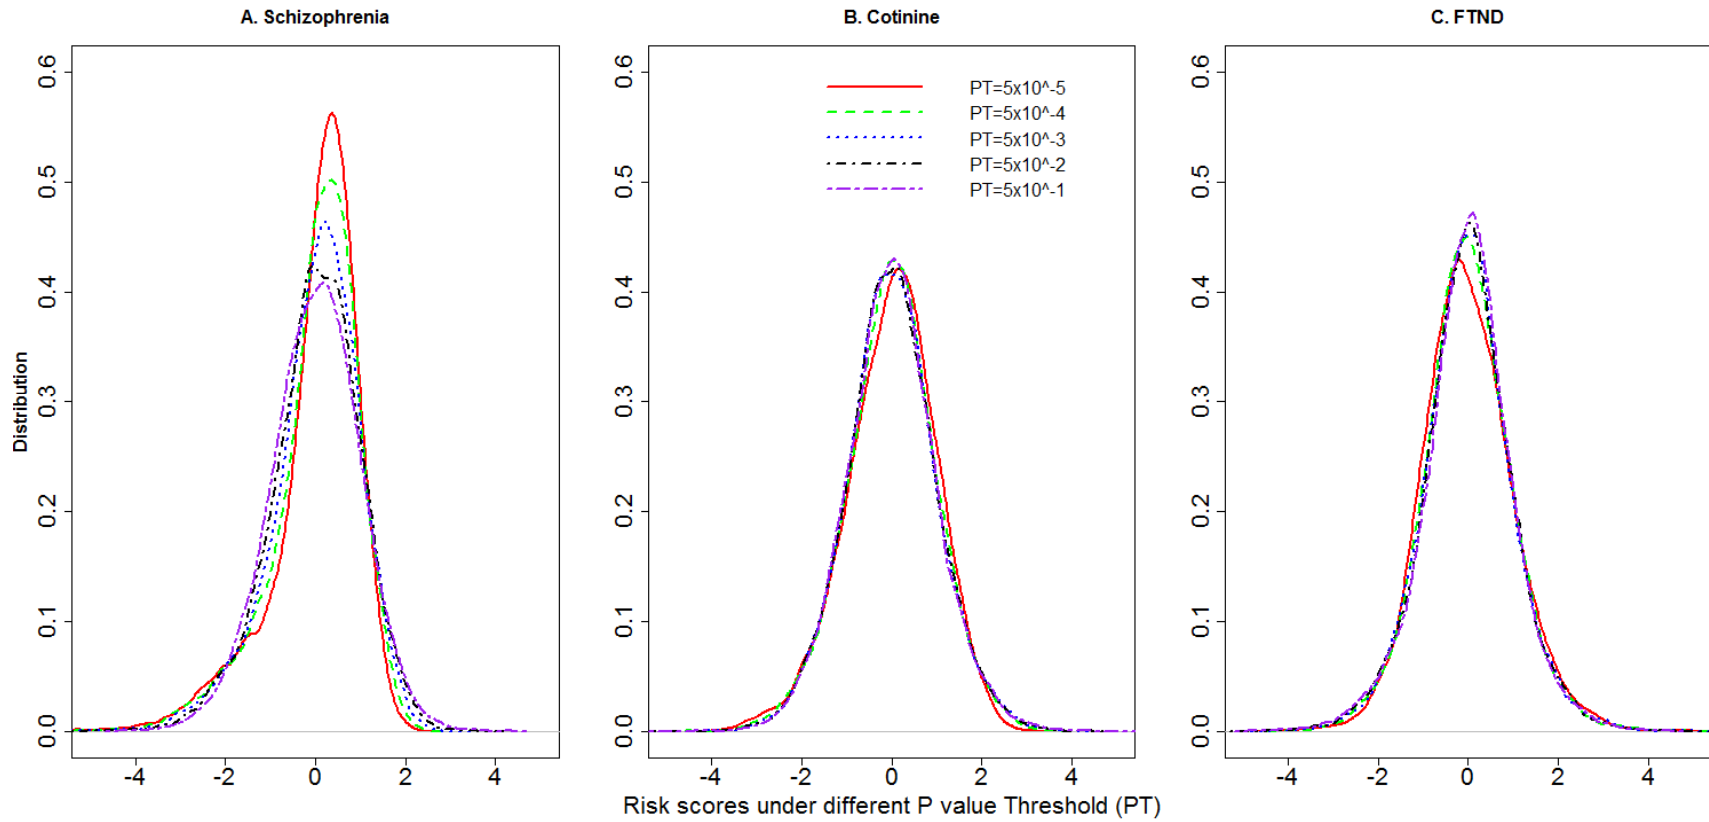

Supplementary Figure S1. Distributions of genetic risk scores used in this study.
